# Supplementary material
Source: PubMed Central journal article supplement (PMC1482555)
Supplement: pnas_0502718103_9.pdf [file pnas_0502718103_9.pdf]

**Table 3. Comparing alternate models (by standard  $R$  factor,  $R_{sim}$ , and  $R_w$ )**

| Min. Confidence and d.f.       |       | Comparison Net. d.f = 1 |       |       | Comparison Net. d.f = 1 |       |       | Comparison Net. d.f = 2 |       |       | Comparison Net. d.f = 2 |       |       | Comparison Net. d.f = 2 |       |       |        |
|--------------------------------|-------|-------------------------|-------|-------|-------------------------|-------|-------|-------------------------|-------|-------|-------------------------|-------|-------|-------------------------|-------|-------|--------|
| Model identifier               | 1     | 2 to 1                  | 2     |       | 3 to 1                  | 3     |       | 4 to 1                  | 4     |       | 5 to 1                  | 5     |       | 6 to 1                  | 6     |       |        |
| <b>Prerefinement</b>           |       |                         |       |       |                         |       |       |                         |       |       |                         |       |       |                         |       |       |        |
| $R_{sim}^*$                    | 21.10 | n/a                     | n/a   | 22.70 | n/a                     | n/a   | 32.20 | n/a                     | n/a   | 33.50 | n/a                     | n/a   | 27.20 | n/a                     | n/a   | 25.10 | n/a    |
| $R$ factor type/<br>confidence | $R$   | $R_w$                   | Conf. | $R$   | $R_w$  |
| All 414 reflections            | 28.63 | 75.05                   | 0.91  | 28.79 | 76.19                   | 0.52  | 45.99 | 117.16                  | 0.81  | 47.61 | 116.26                  | 0.79  | 42.44 | 123.31                  | 0.77  | 43.27 | 127.66 |
| Only meridional                | 32.24 | 80.19                   | 0.65  | 39.80 | 100.38                  | 0.33  | 68.89 | 176.74                  | 0.65  | 80.62 | 164.93                  | 0.82  | 45.95 | 120.10                  | 0.74  | 45.38 | 141.22 |
| <b>Postrefinement</b>          |       |                         |       |       |                         |       |       |                         |       |       |                         |       |       |                         |       |       |        |
| Overall                        | 10.73 | 22.99                   | 0.62  | 20.43 | 47.28                   |       |       |                         |       |       |                         |       |       |                         |       |       |        |
| Group 1                        | 13.35 | 27.74                   | 0.73  | 19.39 | 39.88                   |       |       |                         |       |       |                         |       |       |                         |       |       |        |
| Group 2                        | 6.87  | 14.39                   | 0.86  | 8.51  | 17.47                   |       |       |                         |       |       |                         |       |       |                         |       |       |        |
| Group 3                        | 8.19  | 16.76                   | 0.66  | 17.11 | 35.92                   |       |       |                         |       |       |                         |       |       |                         |       |       |        |
| Group 4                        | 9.61  | 21.62                   | 0.62  | 17.54 | 46.03                   |       |       |                         |       |       |                         |       |       |                         |       |       |        |
| Meridional                     | 17.68 | 38.12                   | 0.59  | 28.15 | 66.64                   |       |       |                         |       |       |                         |       |       |                         |       |       |        |
| Nonoverlapping                 | 15.43 | 33.33                   | 0.66  | 23.11 | 53.05                   |       |       |                         |       |       |                         |       |       |                         |       |       |        |

All  $R$  factors are expressed as percentages; confidence interval (Conf.) as minimum fraction. A high probability/confidence value shows a high degree of similarity/dependence between compared models. The lower confidence interval for model 2 with 1 for meridional subset highlights the difference in chain direction, the meridional series being the subset of the data most susceptible to this difference. d.f., degree of freedom; n/a, not applicable;  $R_{sim}$  = rms of observed and simulated diffraction pattern.  $R$  factor =  $\Sigma(|F_o| - |F_c|)/\Sigma|F_o|$ .

$R_w = [\Sigma\omega(|F_o|^2 - |F_c|^2)^2/\Sigma\omega(F_o^2)^2]^{1/2}$ . All models are fundamentally similar since they have all been fitted to the observed electron density but contain some significant differences:

1. Most logical fit, N- and C-terminal location and chain direction agrees with heavy atom labeling sites.
2. As above, except chain direction reversed, contrary to evidence from labeling sites. (Models 2-4 could be discounted as viable models on this basis alone). Models 1 and 2 were further refined using CNS (see *Methods*).
3. N- and C-terminal ends of molecule swapped in lateral plane, contrary to heavy atom labeling data.
4. Combines 2 and 3.
5. As 1 except small deviation from electron density (see Fig. 11, no. 1).
6. As 1 except small deviation from electron density (see Fig. 11, no. 2).

\*Lowest possible  $R$  factor for some types of random fiber diffraction structure has been estimated at  $\approx 50\%$  [Welsh, L. C., Symmons, M. F., Sturtevant, J. M., Marvin, D. A. & Perham, R. N. (1998) *J. Mol. Biol.* **283**, 155–177], although this was applied to a structure that produced overlapping Bessel functions rather than the type of overlapping Bragg peaks observed in collagens' low-angle diffraction pattern.  $R_{sim}$  here only provides comparison of equatorial reflections; it does not assess the accuracy/error of the meridional series.
