# Supplementary material
Source: PubMed Central journal article supplement (PMC1482555)

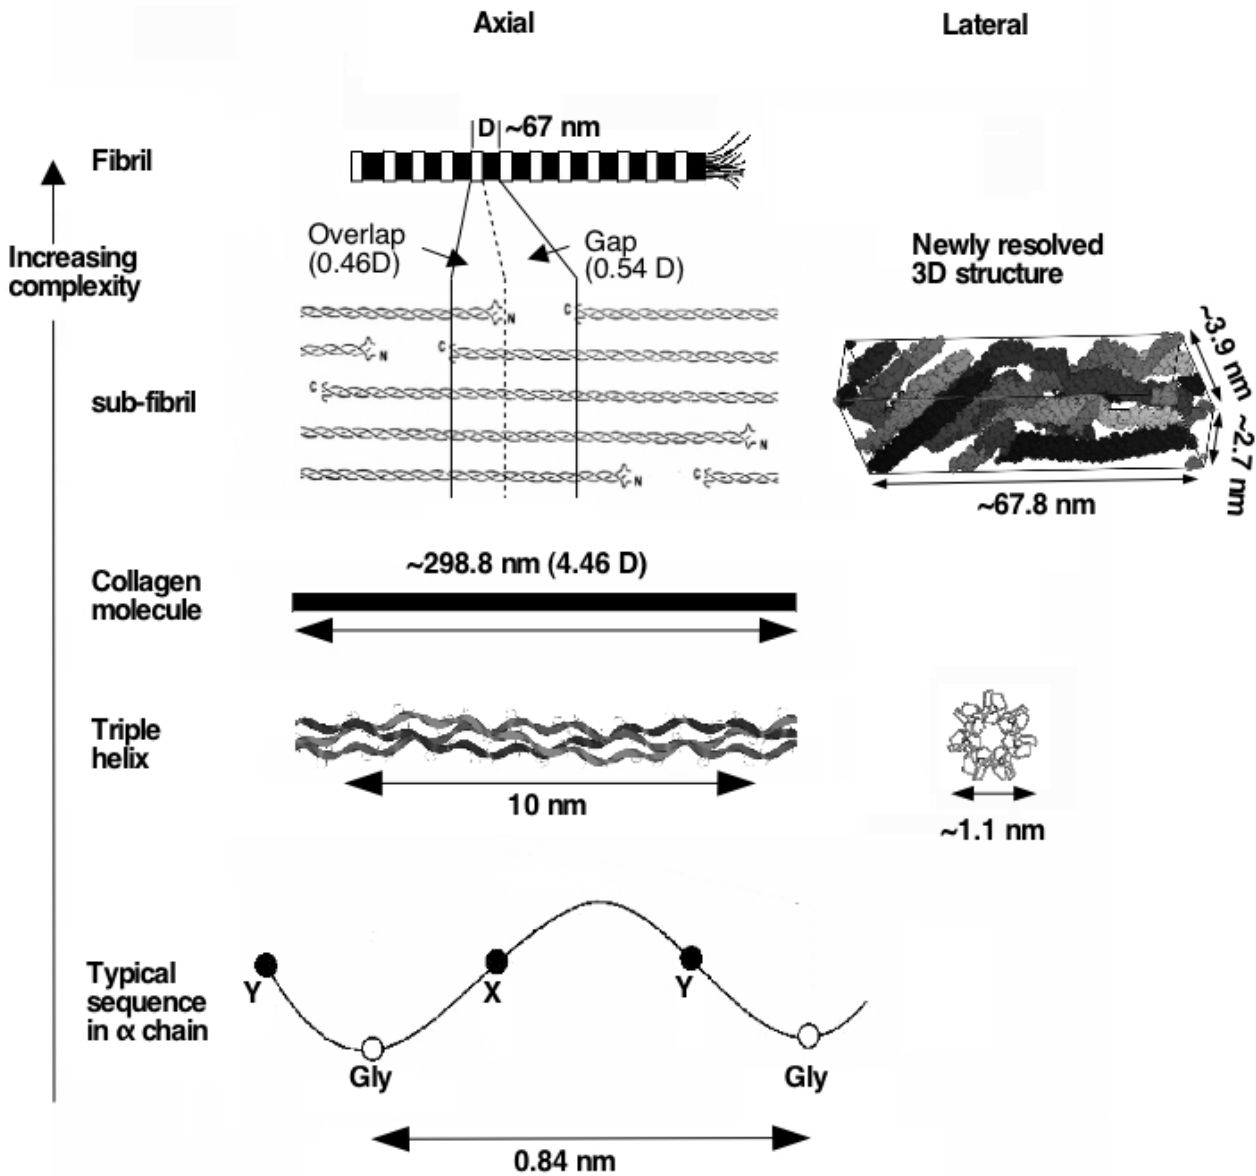

Supplement: pnas_0502718103_1.pdf [file pnas_0502718103_1.pdf]

# Williamson-Hall plot

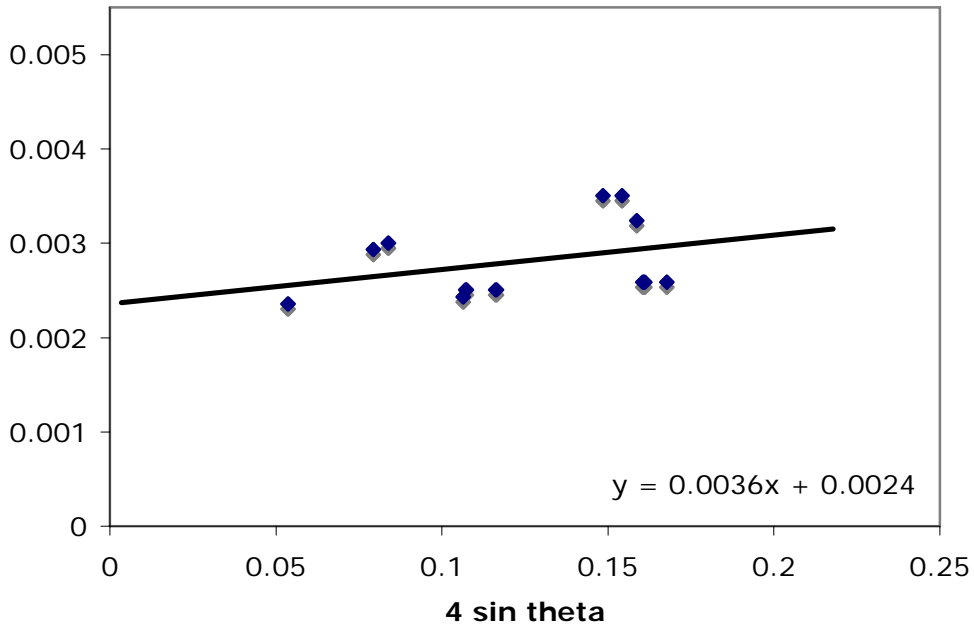

Supplement: pnas_0502718103_2.pdf [file pnas_0502718103_2.pdf]

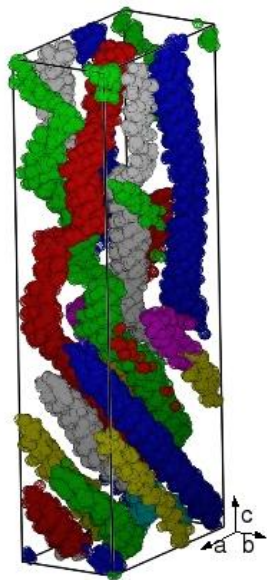

A

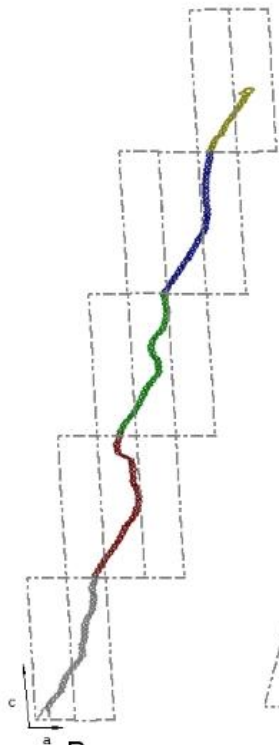

B

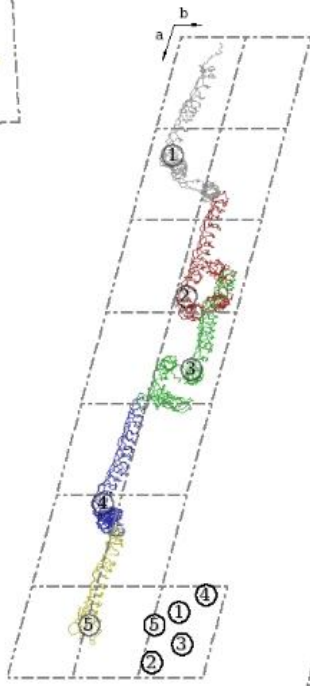

C

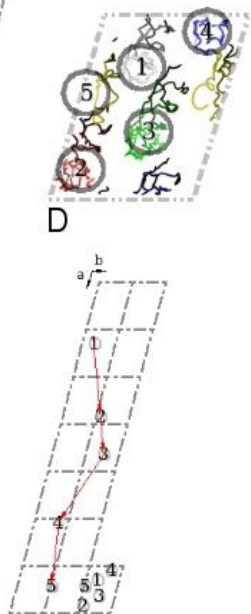

E

D

Supplement: pnas_0502718103_3.pdf [file pnas_0502718103_3.pdf]

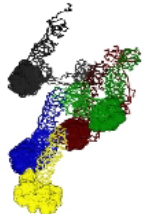

A

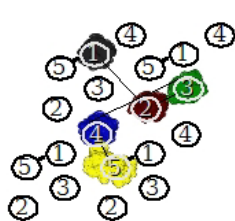

B

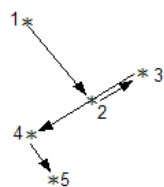

C

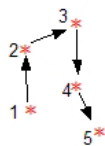

D

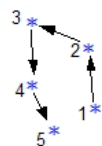

E

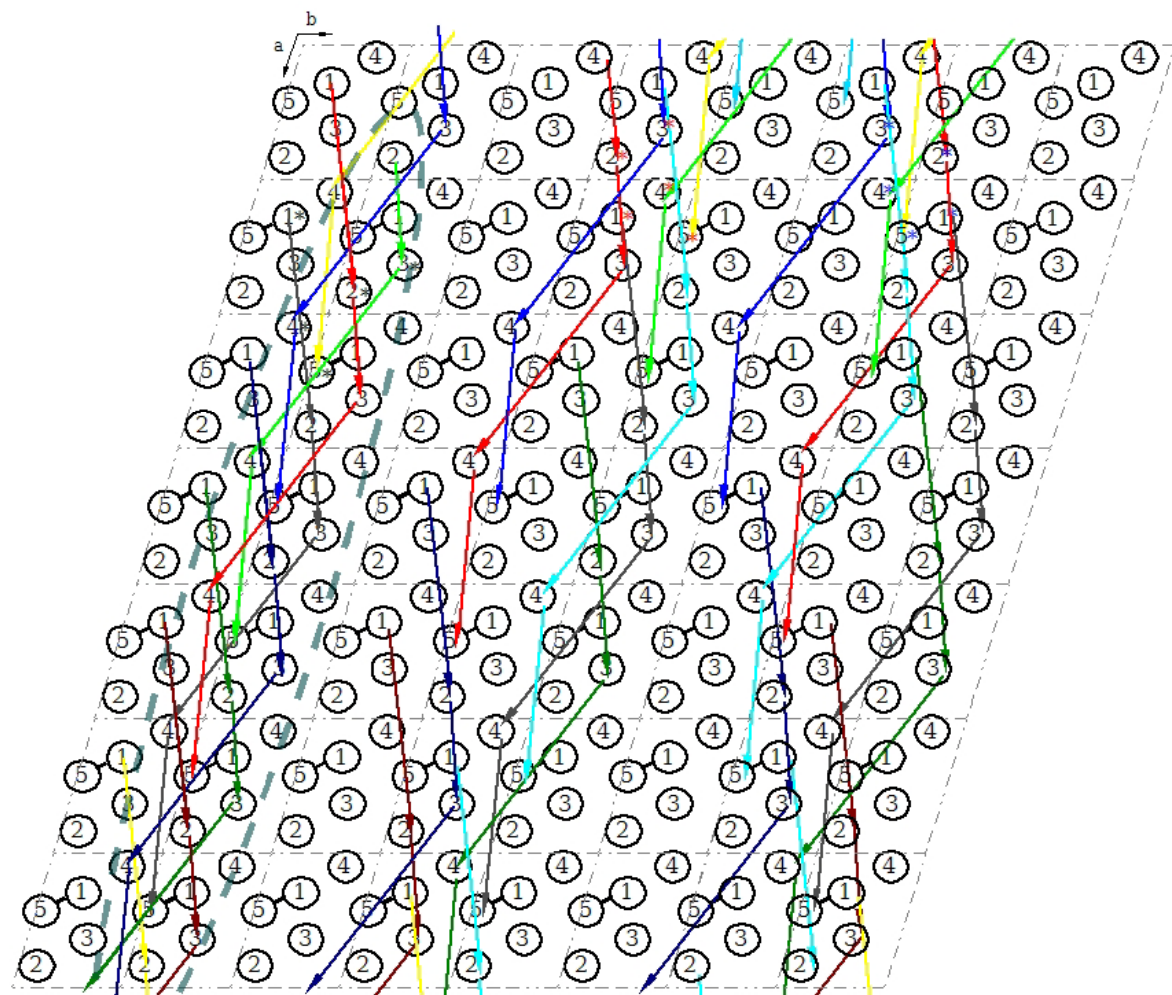

F

Supplement: pnas_0502718103_4.pdf [file pnas_0502718103_4.pdf]

A

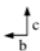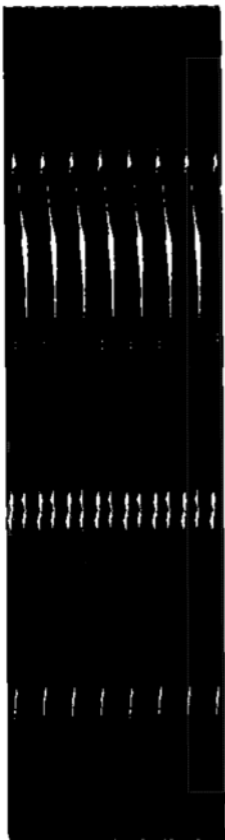

B

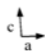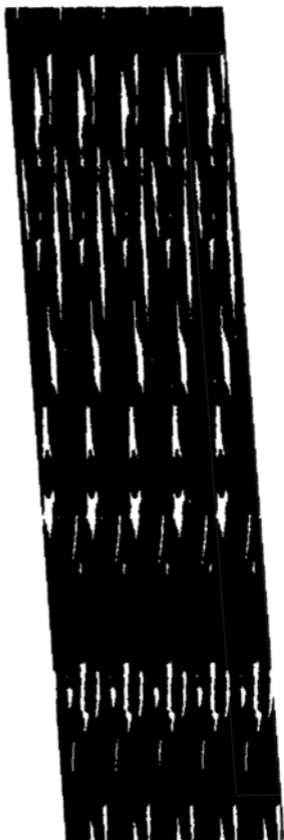

C

D

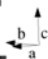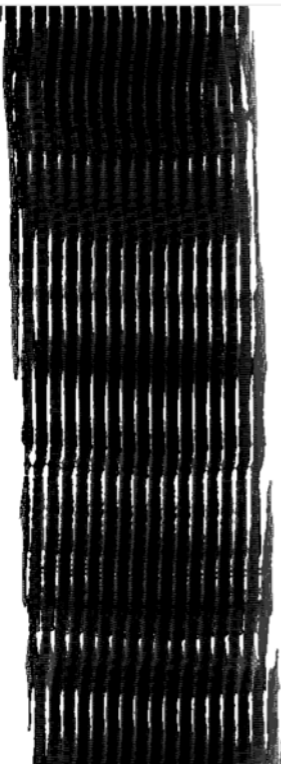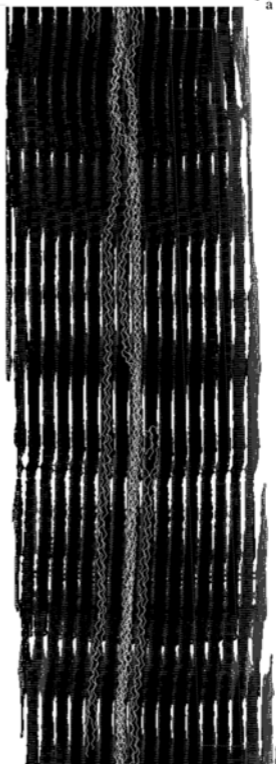

Supplement: pnas_0502718103_5.pdf [file pnas_0502718103_5.pdf]

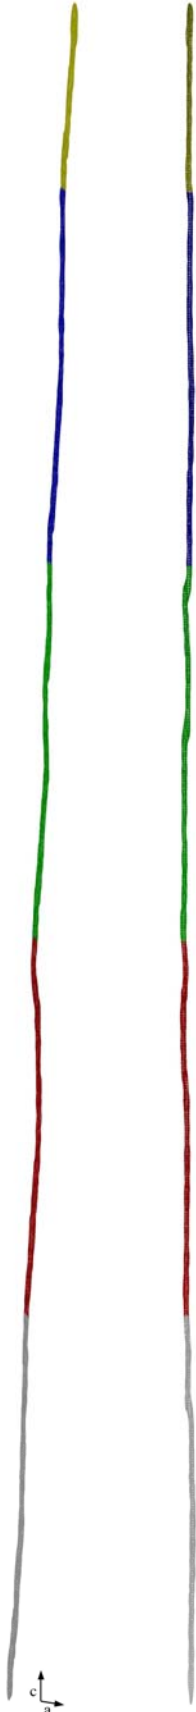

Supplement: pnas_0502718103_6.pdf [file pnas_0502718103_6.pdf]

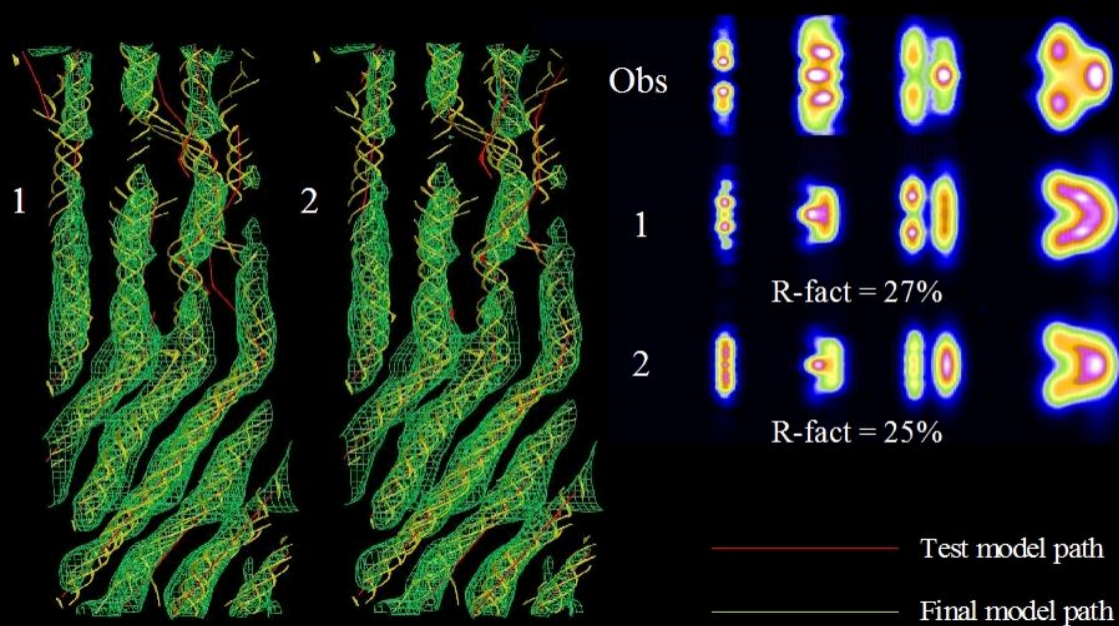

Supplement: pnas_0502718103_7.pdf [file pnas_0502718103_7.pdf]

Group 4

Group 3

Group 2

Group 1

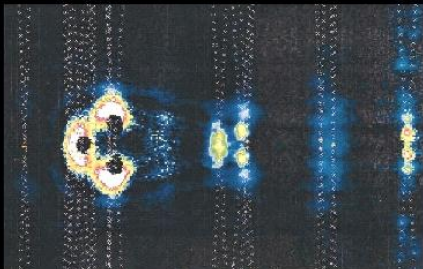

Raw data from Wess et al 1998

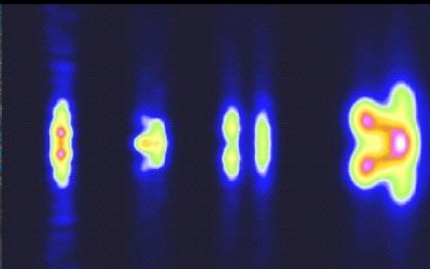

Best model fit before CNS refinement

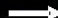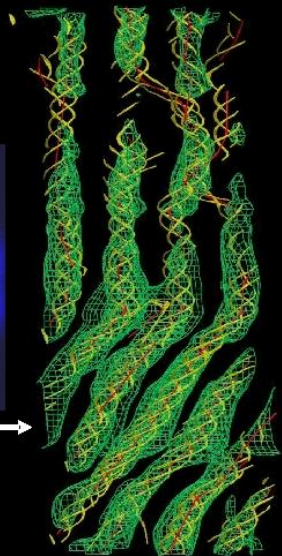

R-factor = 21%

Supplement: pnas_0502718103_8.pdf [file pnas_0502718103_8.pdf]
